# Supplementary material for: Epigenetic regulation of spurious transcription initiation in Arabidopsis
Source: PubMed Central journal article supplement (PMC7319988; doi:10.1038/s41467-020-16951-w), 2020-06-26
Supplement: 41467_2020_16951_MOESM3_ESM.pdf [file 41467_2020_16951_MOESM3_ESM.pdf]

## Descriptions of Additional Supplementary Files

**File name:** Supplementary Data 1

**Description:** Summary of CAGE-seq data mapping

**File name:** Supplementary Data 2

**Description:** Consensus Tag Clusters (consensusTCs) identified in individual samples and across all samples.

**File name:** Supplementary Data 3

**Description:** EPICATs activated in the epigenetic mutants of *A.thaliana*.

**File name:** Supplementary Data 4

**Description:** Gene-body EPICATs in *met1* and *ibm1*. Loci selected for validation by 5'-RACE are marked in red.

**File name:** Supplementary Data 5

**Description:** TEs harboring active TSSs in wild-type *A.thaliana*.

**File name:** Supplementary Data 6

**Description:** Transcripts harboring the EPICATs in *met1*, *ddm1*, and *suvh456*.

**File name:** Supplementary Data 7

**Description:** Transcripts with significant alternative promoter usage in *met1*, *ddm1*, and *suvh456*. Loci harboring the EPICATs are marked in red, and experimentally validated are marked in blue

**File name:** Supplementary Data 8

**Description:** Expression of regular TSSs close to EPICATs. Loci selected for qPCR validation in *met1* and *ddm1* backgrounds are marked in red. x and y refer to regular TSSs and EPICATs, respectively.

**File name:** Supplementary Data 9

**Description:** Summary of CHIP-seq data mapping.

**File name:** Supplementary Data 10

**Description:** Positions of LTRs of Gypsy sub-families (ATGPs) analyzed in this study (Figure 5d, Supplementary Figure 12d).

**File name:** Supplementary Data 11

**Description:** Primers used in this study.
